# Supplementary material
Source: ML conference proceedings conference paper supplement (https://www.ecva.net/papers/eccv_2020/papers_ECCV/html/123470528_ECCV_2020_paper.php)
Supplement: Supplementary file 3 [file 123470528-supp.zip]

Archive with 4 entries (4 files):
- 3622-supp.pdf
- __MACOSX/._3622-supp.pdf
- video.mp4
- __MACOSX/._video.mp4
